# Supplementary material for: Low-temperature ionothermal polymerization of phenazine-based small molecules towards ultrastable and high-capacity anodes of aqueous alkaline sodium-ion batteries
Source: Royal Society of Chemistry journal article supplement (doi:10.1039/d4ta05193a), 2024-01-01
Supplement: d4ta05193a1.pdf [file d4ta05193a1.pdf]

## **Low-temperature ionothermal polymerization of phenazine-based small molecules towards ultrastable and high-capacity anode of aqueous alkaline sodium-ion batteries**

Xiaorong Yan<sup>1</sup>, Mingjun Hu<sup>1\*</sup>, Guoqing Zhao<sup>1</sup>, Chuanguang Wu<sup>1</sup>, Rui Li<sup>2</sup>, Xinyu Wang<sup>2</sup>, Haiping Yu<sup>2</sup>, Zihui Wang<sup>1</sup>, Bei Wang<sup>2</sup>, Yuxin Hao<sup>2</sup>, Jingru Liu<sup>2</sup>, Yilan Wu<sup>3\*</sup>, Jun Yang<sup>2,4,\*</sup>

*1 School of Materials Science and Engineering, Beihang University, Beijing 100191, China*

*2 Beijing Institute of Nanoenergy & Nanosystems, Chinese Academy of Sciences, Beijing 101400, China*

*3. School of Chemical Engineering, The University of Queensland, Brisbane, QLD 4072, Australia*

*4. Shensi Lab, Shenzhen Institute for Advanced Study, University of Electronic Science and Technology of China, Shenzhen 518110, China*

\*Corresponding authors.

E-mail: mingjunhu@buaa.edu.cn; yilan.wu@uqconnect.edu.au; yangjun@binn.cas.cn.

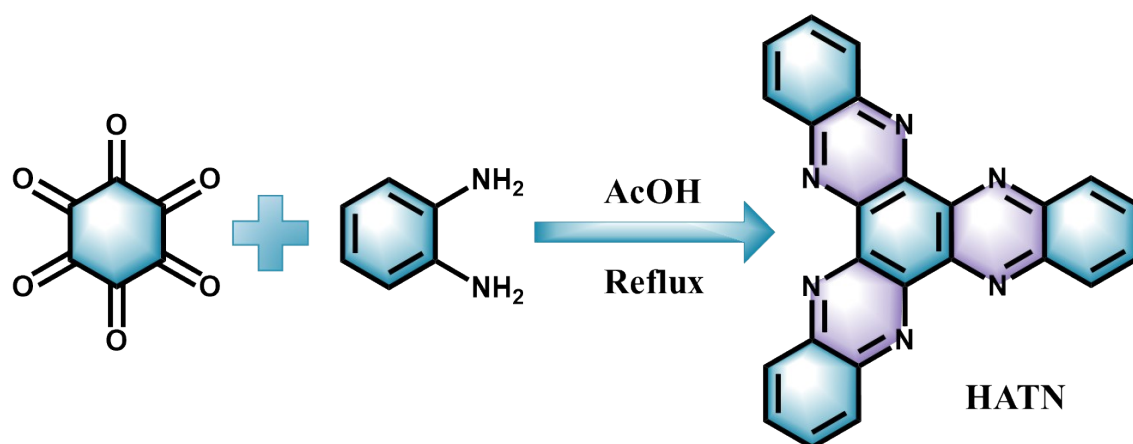

Figure S1. Illustration of the preparation process of HATN.

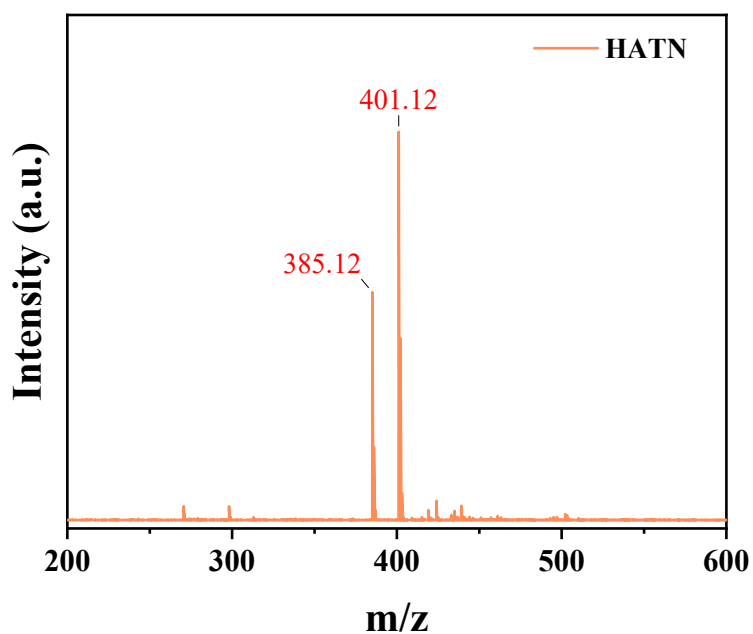

Figure S2. ESI-MS spectrum of HATN. Calculated HATN m/z value: 384,  $[\text{HATN}+\text{H}]^+$ : 385, found 385.12,  $[\text{HATN}+\text{NH}_4]^+$ : 401, found 401.12.

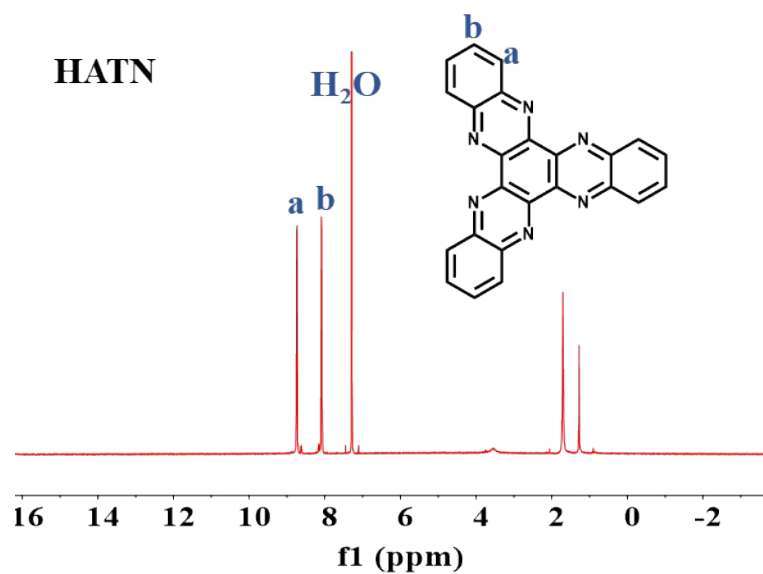

Figure S3. <sup>1</sup>H NMR (400 MHz, CDCl<sub>3</sub>) spectrum of HATN.

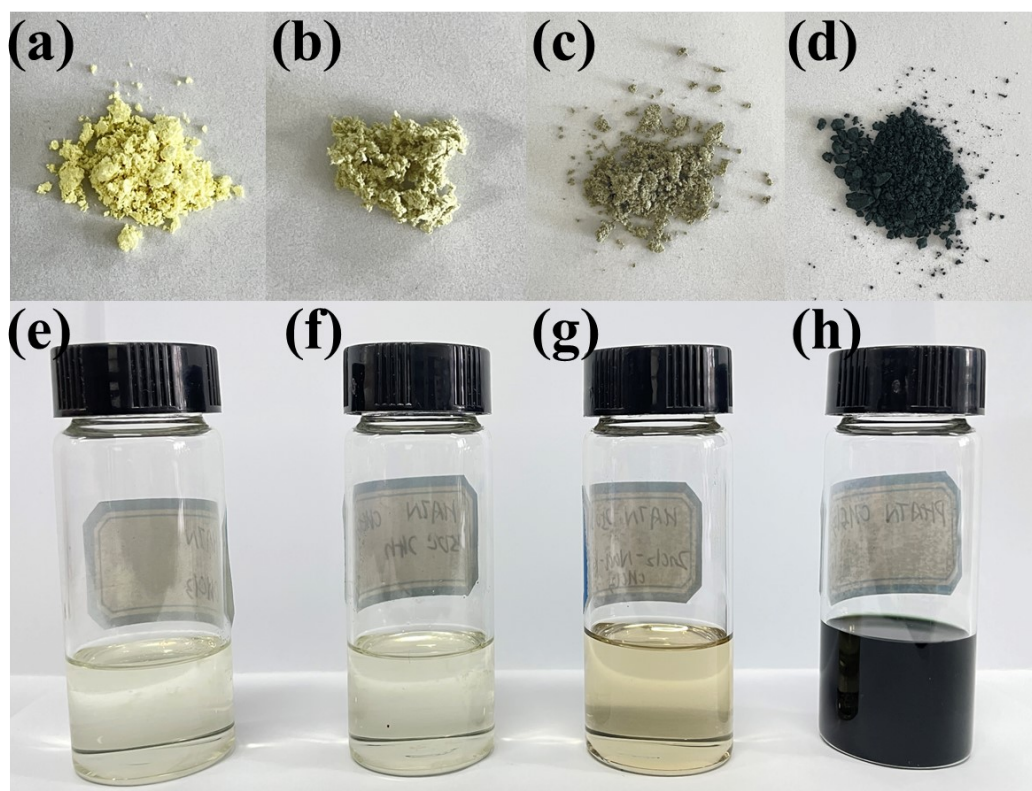

Figure S4. Photographs of products: (a) HATN; (b) the products after heating HATN at 250 °C for 24h; (c) the products after heating the mixture of HATN and ZnCl<sub>2</sub>-NaCl-KCl at 250 °C for 24h; (d) PHATN (the products after heating the mixture of HATN and AlCl<sub>3</sub>-NaCl-KCl at 250 °C for 24h). Photographs to show the solubility of the products in CHCl<sub>3</sub>: (e) the solubility of a; (f) the solubility of b; (g) the solubility of c; (h) the dispersion of d. The results show the PHATN is black and was not well dissolved by CHCl<sub>3</sub>.

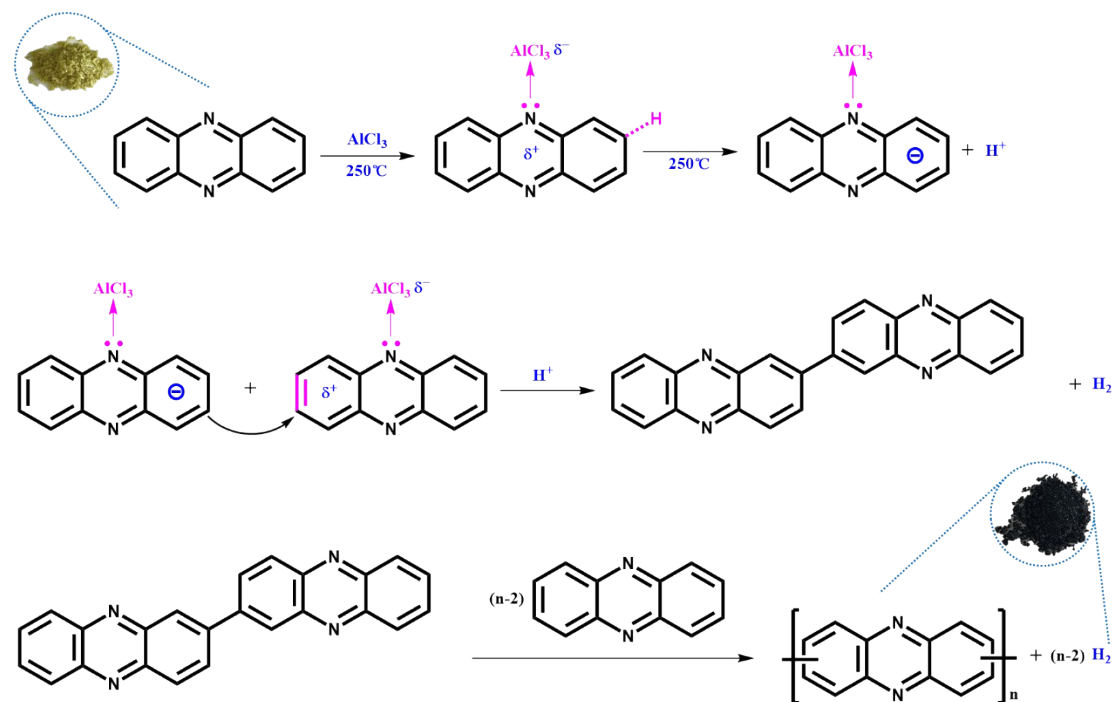

Figure S5. The proposed dehydrocoupling reaction mechanism of PPZ.

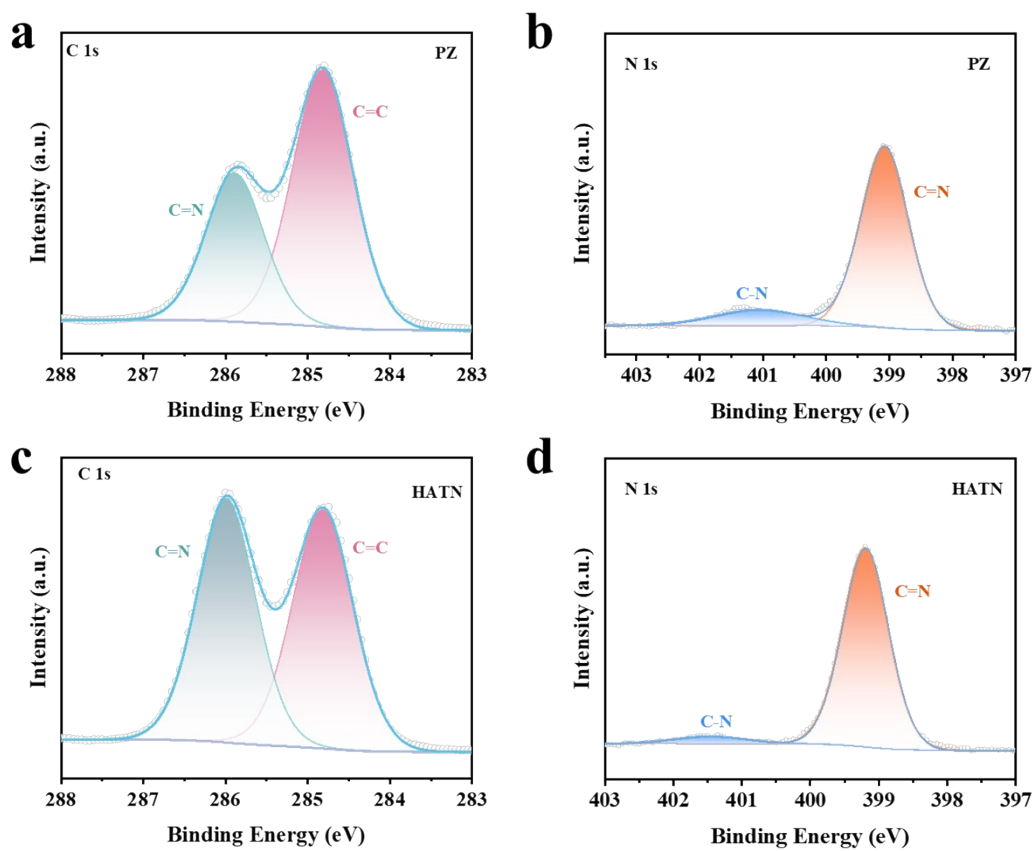

Figure S6. (a) The C 1s XPS spectra of PZ. (b) The N 1s XPS spectra of PZ. (c) The C 1s XPS spectra of HATN. (d) The N 1s XPS spectra of HATN.

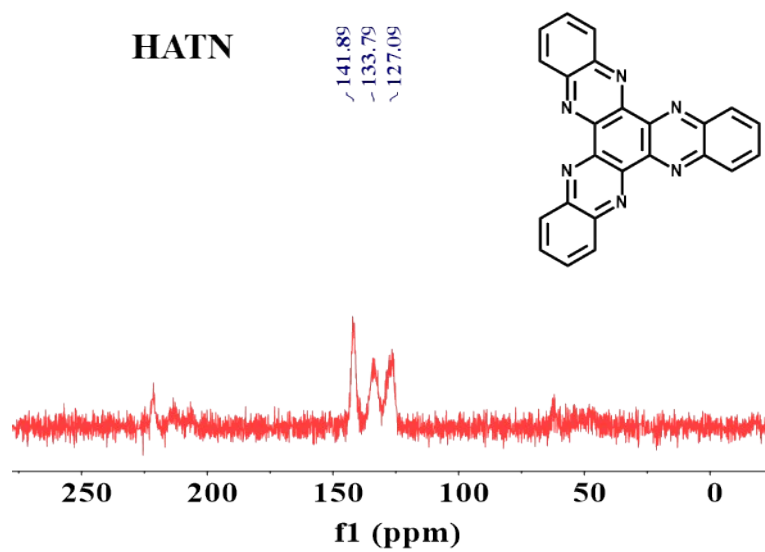

Figure S7.  $^{13}\text{C}$  solid-state NMR spectrum of HATN.

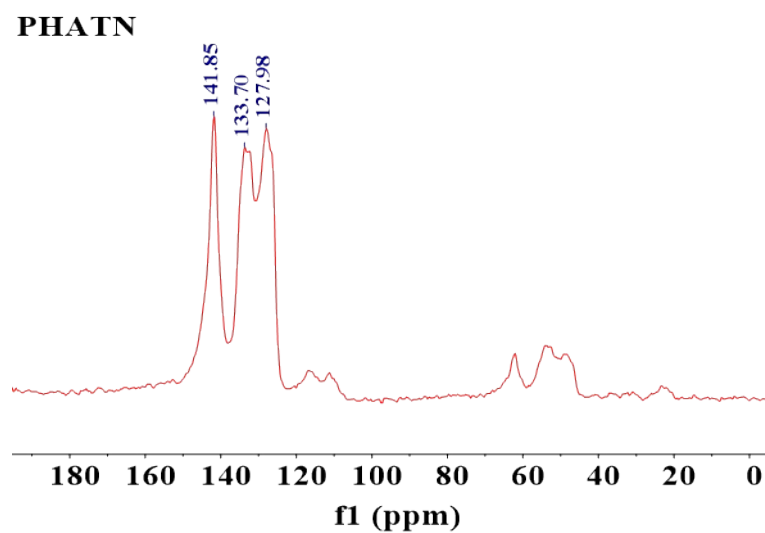

Figure S8.  $^{13}\text{C}$  solid-state NMR spectrum of PHATN.

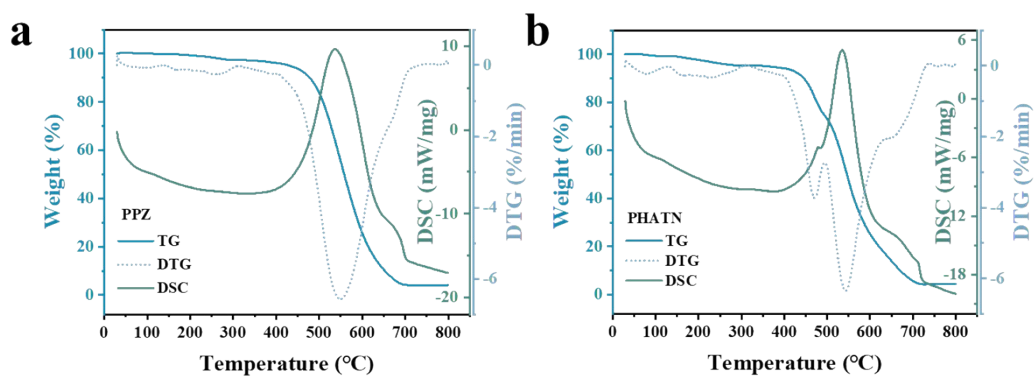

Figure S9. The TGA, DTG and DSC curves of (a) PPZ and (b) PHATN in Air.

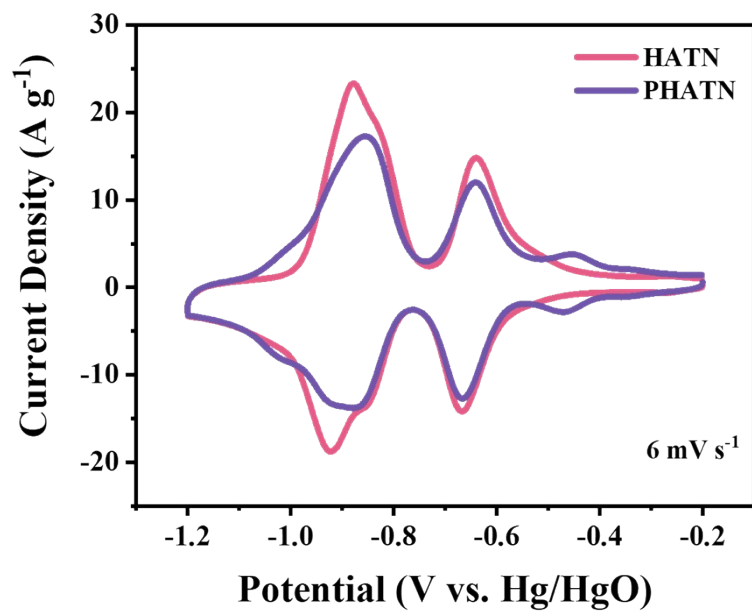

Figure S10. CV curves of HATN and PHATN at  $6 \text{ mV s}^{-1}$ .

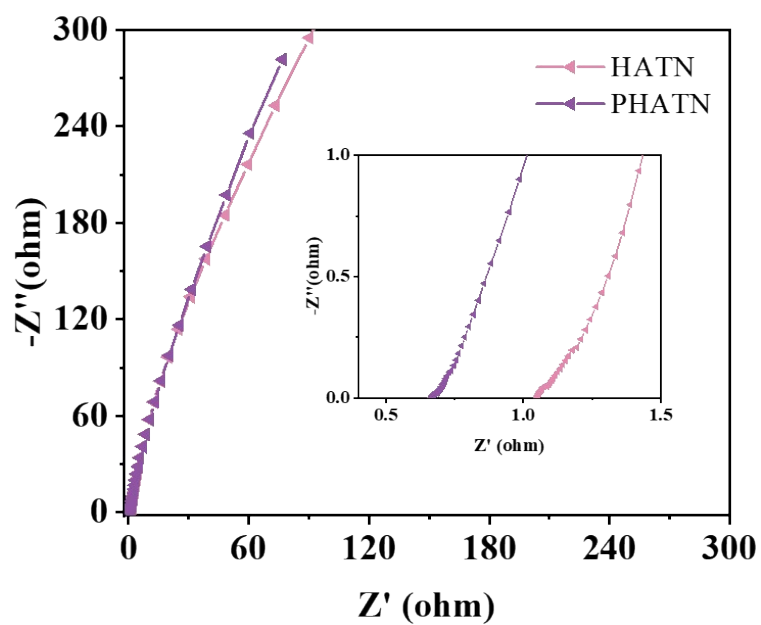

Figure S11. The electrochemical impedance spectrum (EIS) of HATN and PHATN.

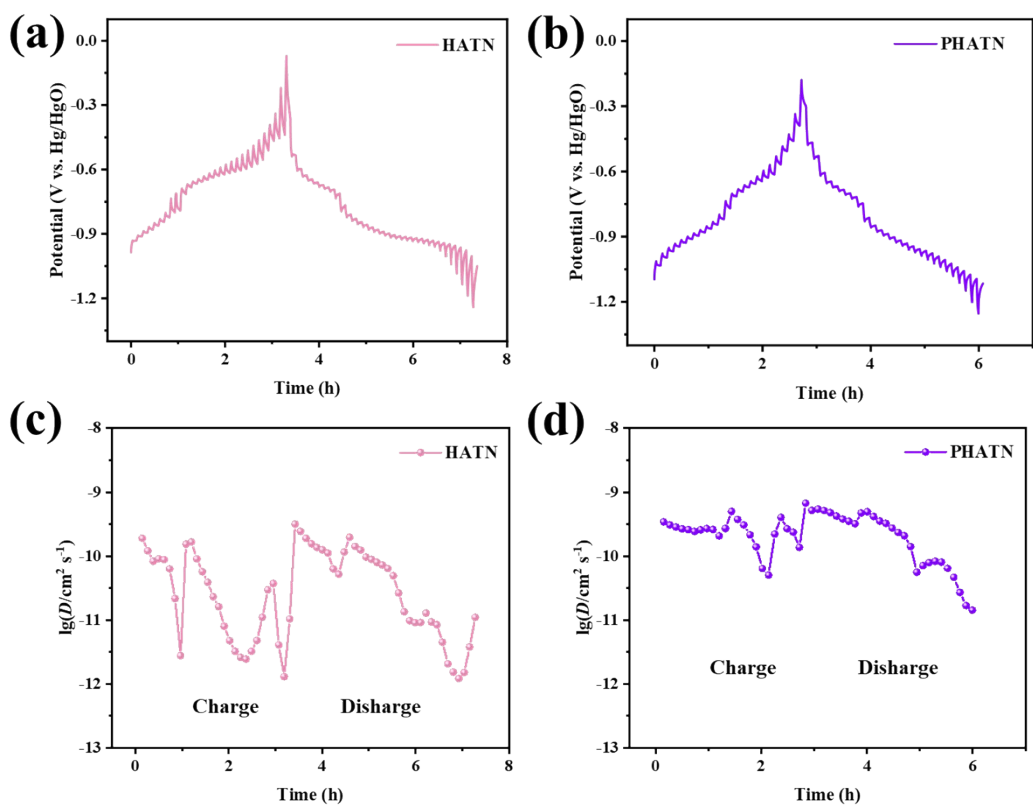

Figure S12. The GITT curves of (a) HATN and (b) PHATN; The ion diffusion coefficients of (c) HATN and (d) PHATN.

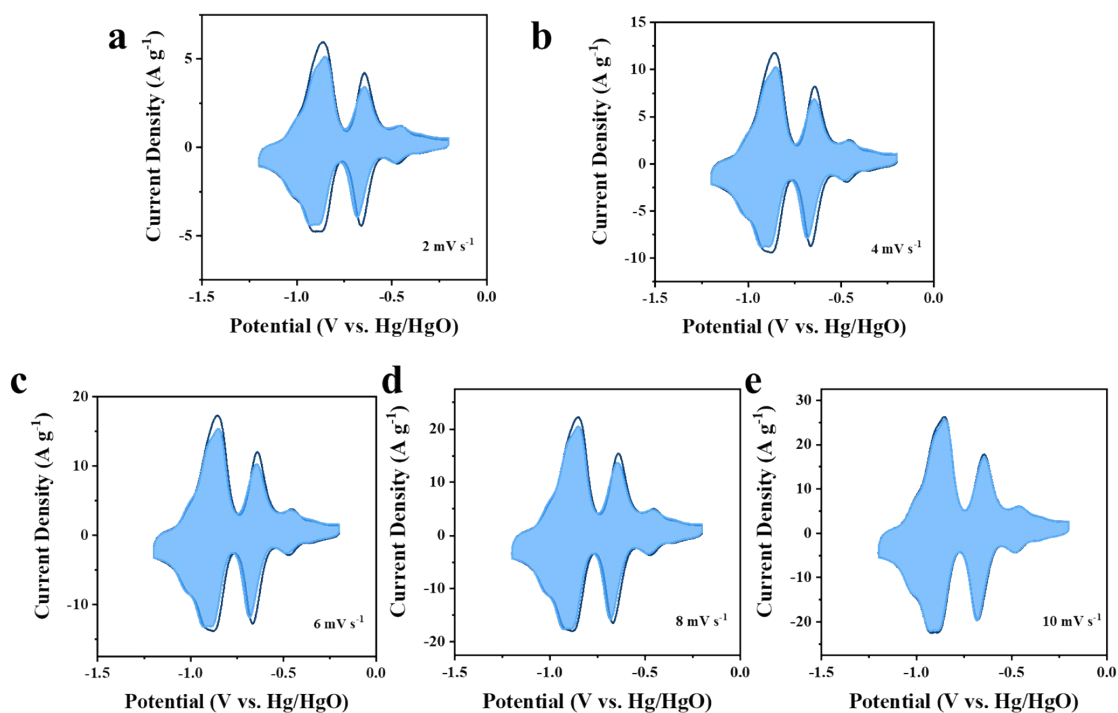

Figure S13. The calculated capacitive current curves (blue regions) at different scan rates ( $2\text{mV s}^{-1}$ ;  $4\text{mV s}^{-1}$ ;  $6\text{mV s}^{-1}$ ;  $8\text{mV s}^{-1}$ ;  $10\text{mV s}^{-1}$ ) of PHATN.

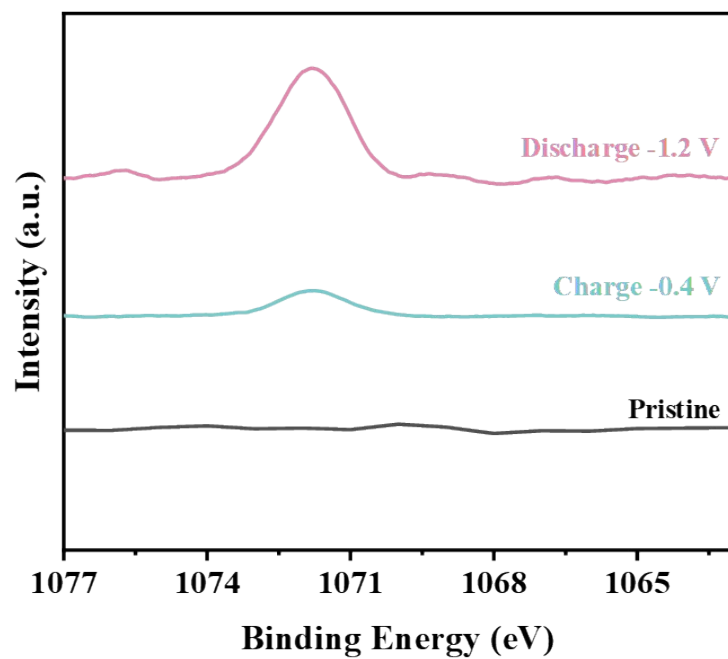

Figure S14. Na 1s XPS spectra of PHATN at different discharge and charge states.

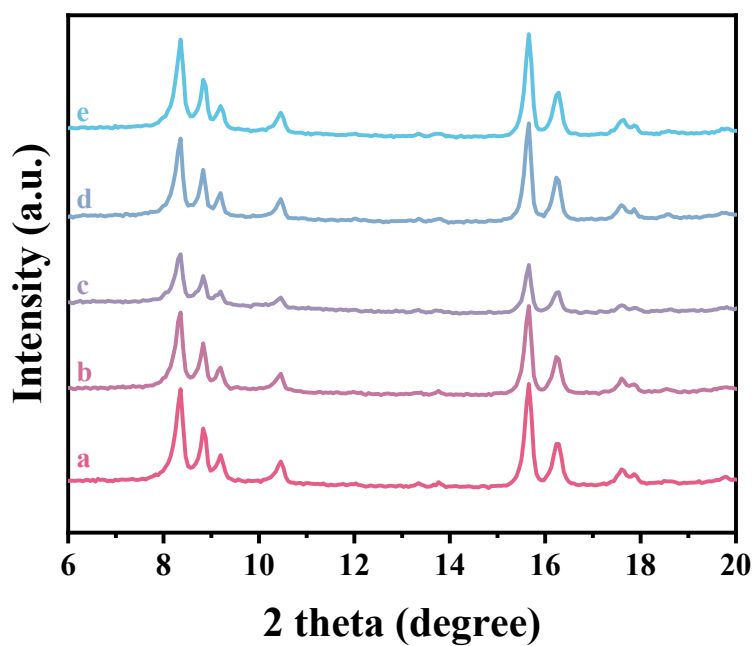

Figure S15. Ex-situ XRD of PHATN electrode as the anode at different discharge and charge states.



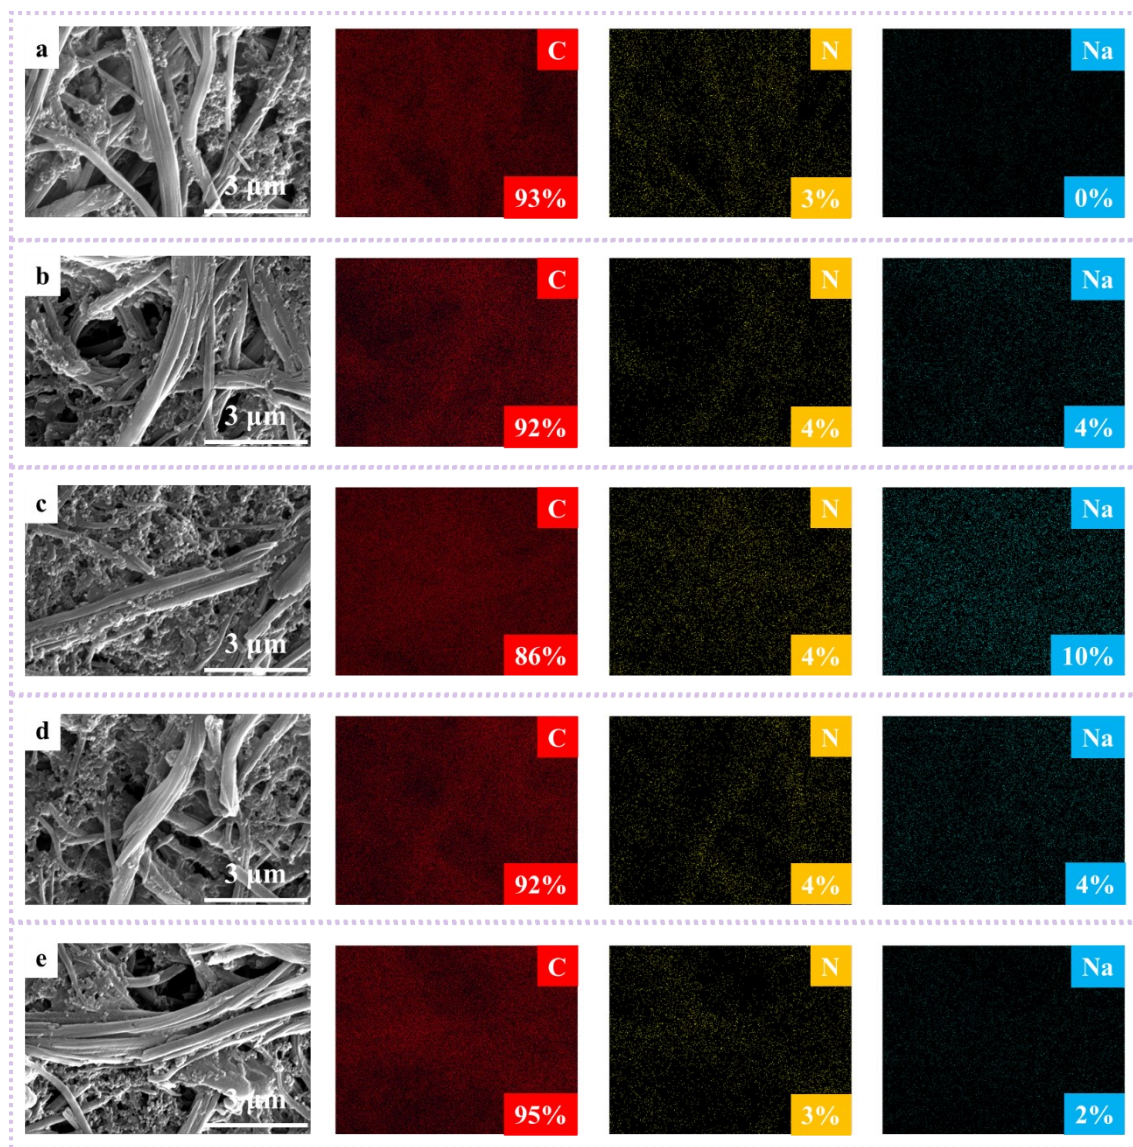

Figure S16. The SEM-EDS mapping images of PHATN electrodes at different charge/discharge states.

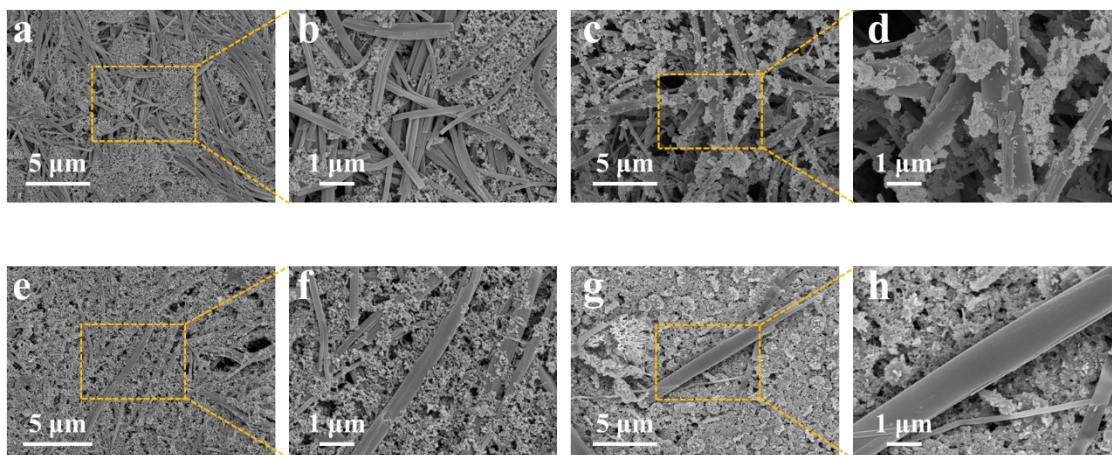

Figure S17. The SEM images of (a, b) pristine electrodes and (c, d) electrodes after 10000 cycles of HATN, and (e, f) pristine electrodes and (g, h) electrodes after 10000 cycles of PHATN.

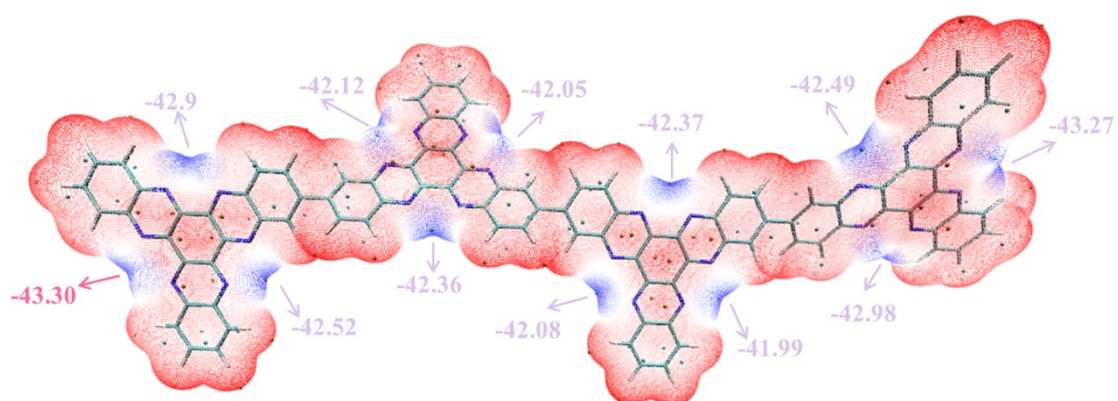

Figure S18. Electrostatic potential diagrams of the tetramer of HATN.

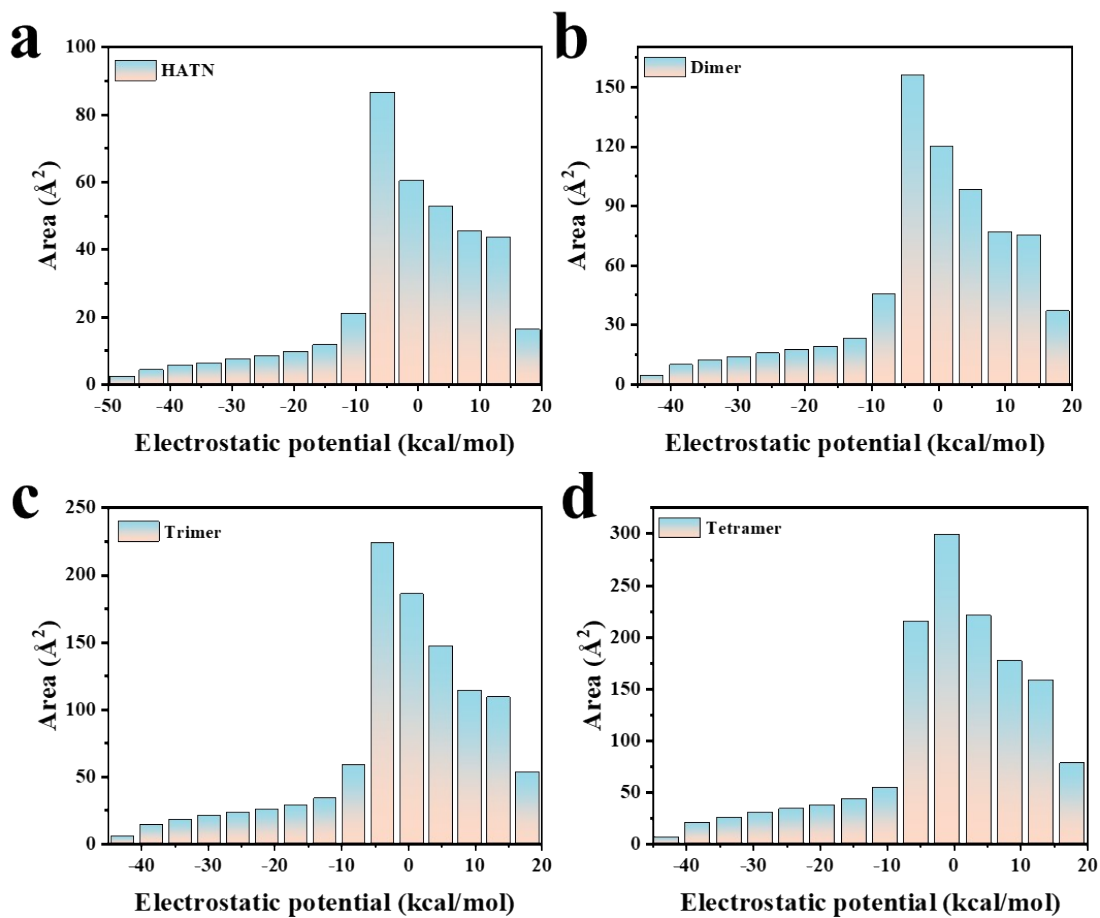

Figure S19. Quantitative distribution of electrostatic potential of HATN, dimer, trimer and tetramer.

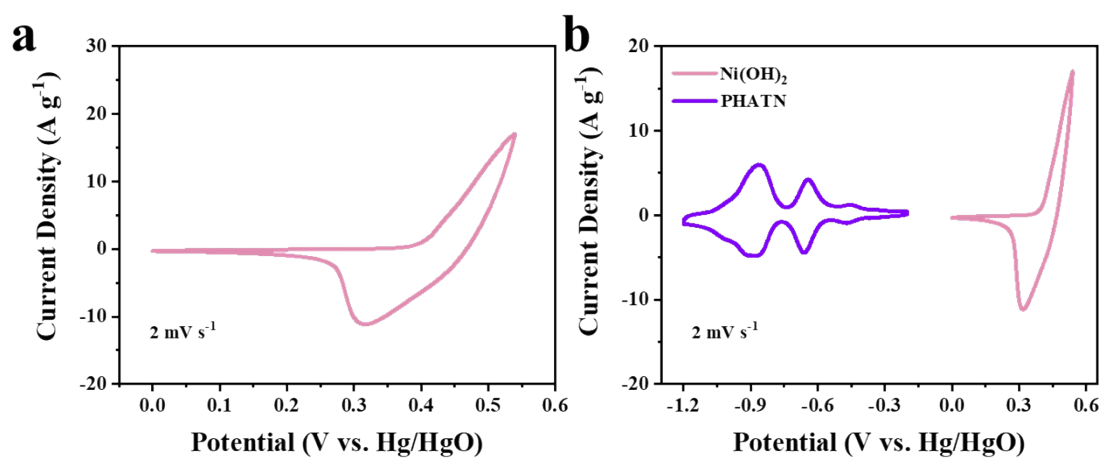

Figure S20. (a) CV curves of  $\text{Ni(OH)}_2$  at  $2 \text{ mV s}^{-1}$ . (b) CV curves of PHATN and  $\text{Ni(OH)}_2$  at  $2 \text{ mV s}^{-1}$ .

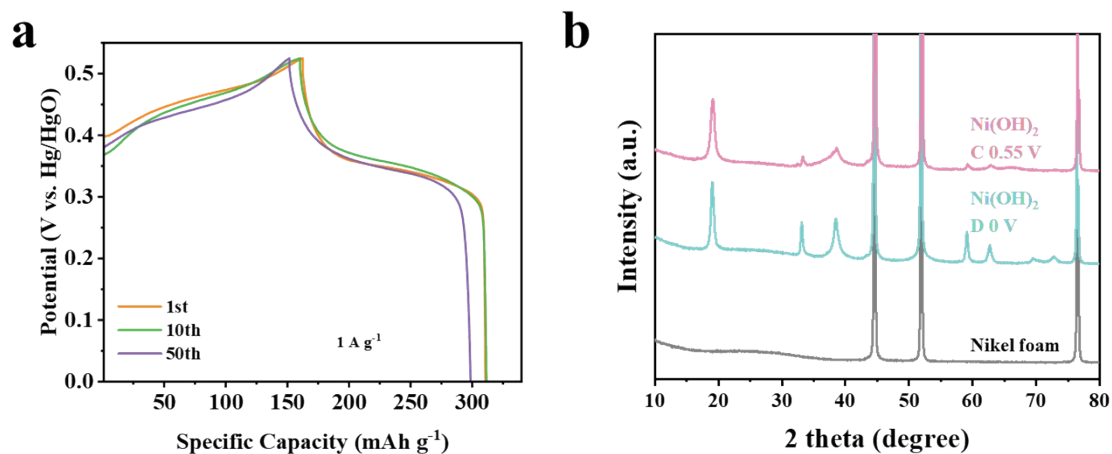

Figure S21. (a) Charge-discharge curves of  $\text{Ni}(\text{OH})_2$  electrodes at different cycles. (b) XRD patterns of  $\text{Ni}(\text{OH})_2$  electrodes at different charge/discharge states.

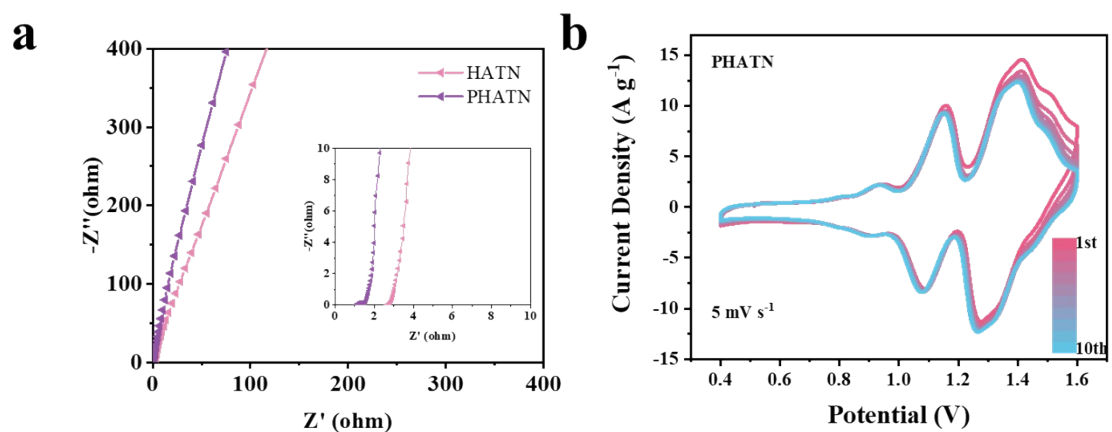

Figure S22. (a) EIS of HATN/ $\text{Ni}(\text{OH})_2$  and PHATN/ $\text{Ni}(\text{OH})_2$ . (b) CV curves of PHATN/ $\text{Ni}(\text{OH})_2$  at  $5 \text{ mV s}^{-1}$ .

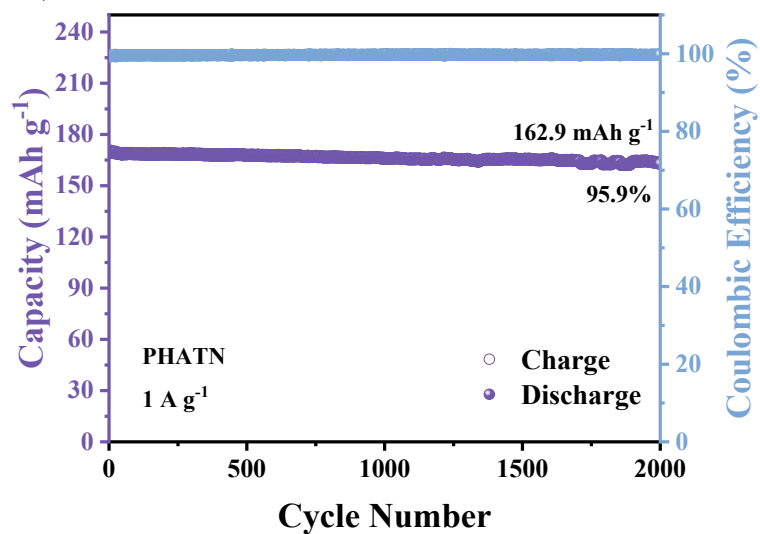

Figure S23. Cycle performance of PHATN/ $\text{Ni}(\text{OH})_2$  at  $1 \text{ A g}^{-1}$ .



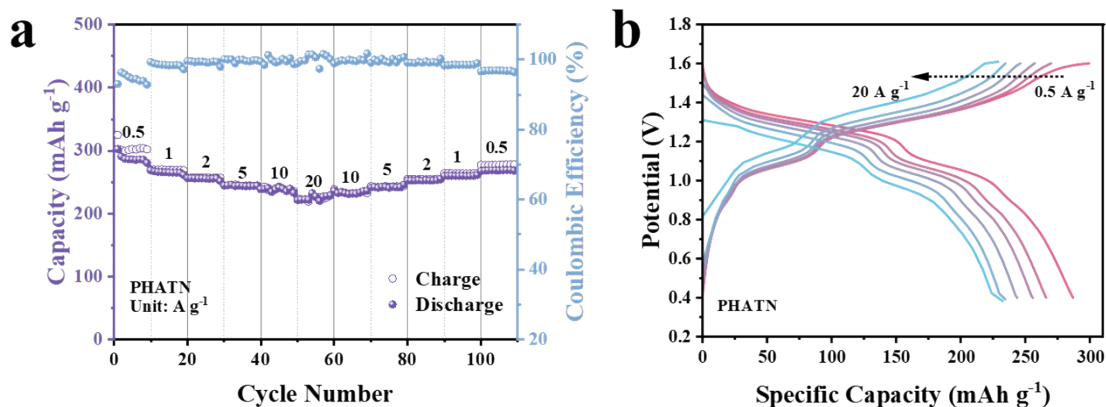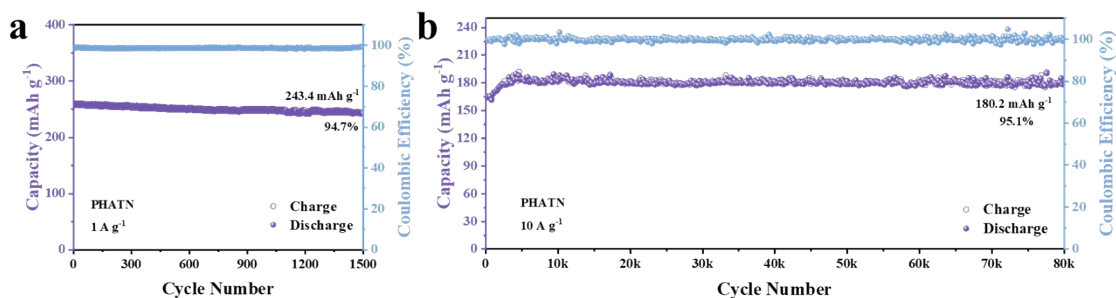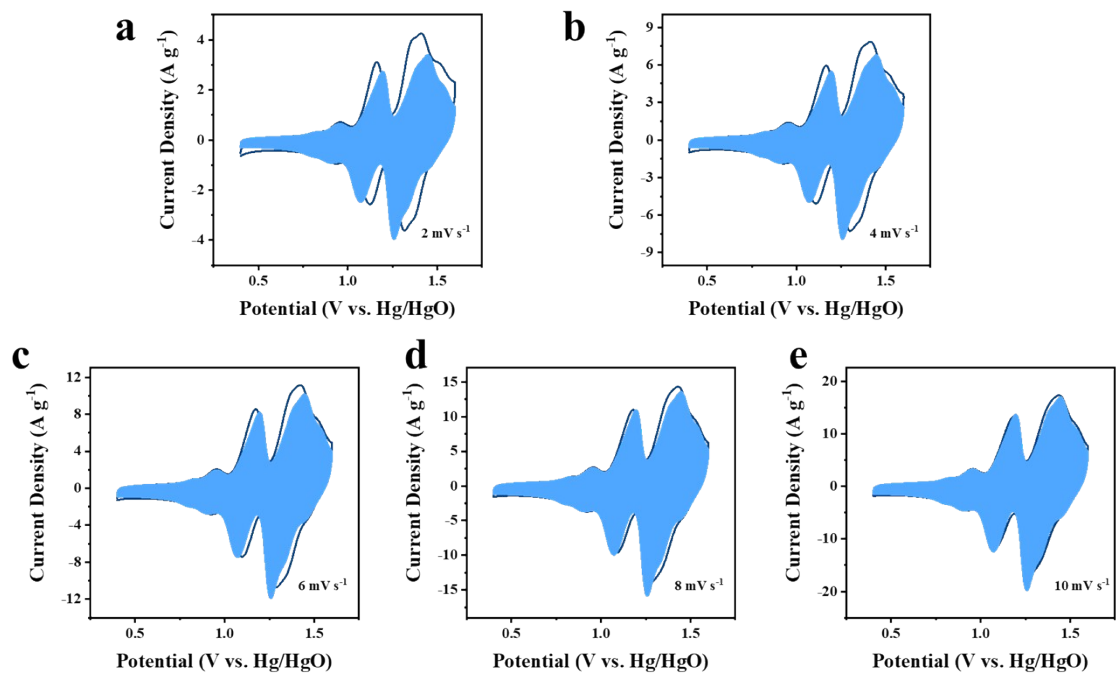

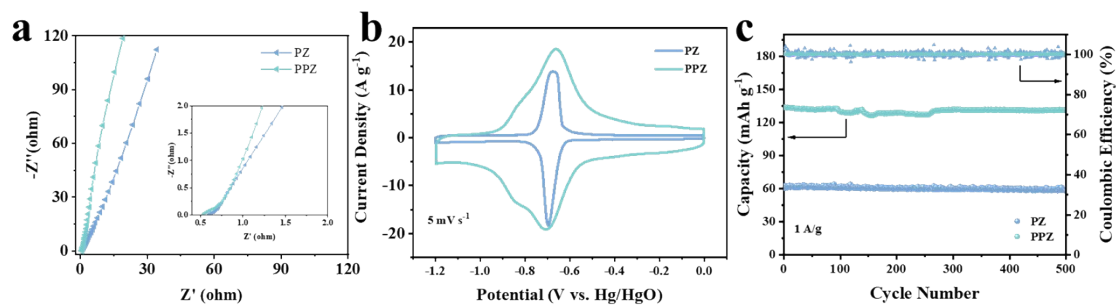

Figure S27. (a) EIS of PZ and PPZ as anode. (b) CV curves of PZ and PPZ as the anode at  $5 \text{ mV s}^{-1}$ . (c) Cycling performance of PZ and PPZ as anode at  $1 \text{ A g}^{-1}$

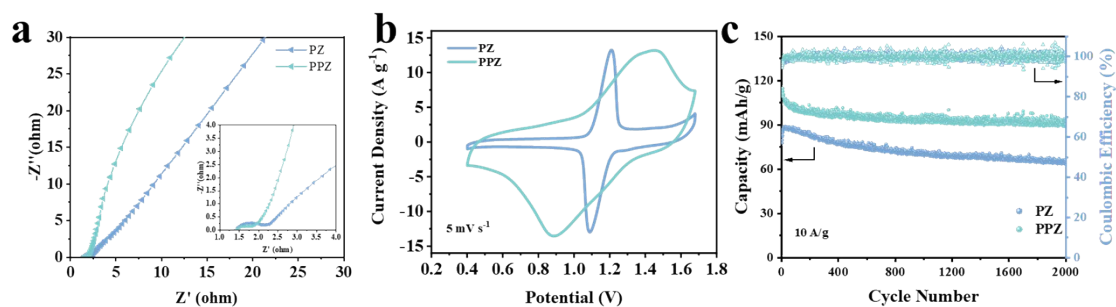

Figure S28. (a) EIS of PZ//Ni(OH)<sub>2</sub> and PPZ//Ni(OH)<sub>2</sub>. (b) CV curves of PZ//Ni(OH)<sub>2</sub> and PPZ//Ni(OH)<sub>2</sub> at  $5 \text{ mV s}^{-1}$ . (c) Cycling performance of PZ//Ni(OH)<sub>2</sub> and PPZ//Ni(OH)<sub>2</sub> at  $1 \text{ A g}^{-1}$

Table S1. The electronic conductivity of the obtained samples.

| Sample | Test content            | Test methods     | Results  |          |          | units |
|--------|-------------------------|------------------|----------|----------|----------|-------|
|        |                         |                  | 2 Mpa    | 4 Mpa    | 6 Mpa    |       |
| PZ     | Electrical conductivity | Quadrupole probe | 1.39E-07 | 1.89E-07 | 2.19E-07 | S / m |
| PPZ    | Electrical conductivity | Quadrupole probe | 1.33E-04 | 1.92E-04 | 2.46E-04 | S / m |
| HATN   | Electrical conductivity | Quadrupole probe | 2.47E-09 | 3.82E-09 | 5.44E-09 | S / m |
| PHATN  | Electrical conductivity | Quadrupole probe | 1.91E-06 | 3.60E-06 | 4.80E-06 | S / m |

Table S2. Rate performance and cycling performance comparison of PHATN//Ni(OH)<sub>2</sub> with other materials-based aqueous sodium-ion batteries reported in the literature.

| Sample                                                                                                     | electrolyte                                                                       | Discharge capacity (mAh g <sup>-1</sup> )                                    | Cycling performance (Current density)                | Ref. |
|------------------------------------------------------------------------------------------------------------|-----------------------------------------------------------------------------------|------------------------------------------------------------------------------|------------------------------------------------------|------|
| CDPZ@G // Ni-MOF                                                                                           | 10 M NaOH                                                                         | 130.5 (0.5 A g <sup>-1</sup> ) based on the anode mass                       | 91.3% / After 1500 cycles (6 A g <sup>-1</sup> )     | 1    |
| 3CN-DPZ // Ni-BTA                                                                                          | 10 M NaOH                                                                         | 323.6 (2 A g <sup>-1</sup> ) based on the anode mass                         | 96.4% / After 5000 cycles (8 A g <sup>-1</sup> )     | 2    |
| PBA // CrCrPBA                                                                                             | 17 M NaClO <sub>4</sub>                                                           | 52.8 (0.125 A g <sup>-1</sup> ) based on the anode mass                      | 93.01% / After 500 cycles (3.75 A g <sup>-1</sup> )  | 3    |
| N-NaVTP // N-NaVTP                                                                                         | Saturated NaClO <sub>4</sub>                                                      | 49.7 (0.2 A g <sup>-1</sup> ) based on the total mass of cathode and anode   | 60% / After 1000 cycles (5 A g <sup>-1</sup> )       | 4    |
| Na <sub>3</sub> MnTi(PO <sub>4</sub> ) <sub>3</sub> // Na <sub>3</sub> MnTi(PO <sub>4</sub> ) <sub>3</sub> | 1 M Na <sub>2</sub> SO <sub>4</sub>                                               | 57.9 (0.029 A g <sup>-1</sup> ) based on the total mass of cathode and anode | 98% / After 100 cycles (0.0587 A g <sup>-1</sup> )   | 5    |
| NaTi <sub>2</sub> (PO <sub>4</sub> ) <sub>3</sub> // Na <sub>2</sub> NiFe(CN) <sub>6</sub>                 | 0.5 M Na <sub>2</sub> SO <sub>4</sub>                                             | 77 (0.06 A g <sup>-1</sup> ) based on the total mass of cathode and anode    | 96% / After 300 cycles (0.06 A g <sup>-1</sup> )     | 6    |
| NaTi <sub>2</sub> (PO <sub>4</sub> ) <sub>3</sub> // Na <sub>2</sub> NiFe(CN) <sub>6</sub>                 | 0.5 M Na <sub>2</sub> SO <sub>4</sub> // 0.1M Na <sub>4</sub> Fe(CN) <sub>6</sub> | 110 (0.06 A g <sup>-1</sup> ) based on the total mass of cathode and anode   | 84.7% / After 1000 cycles (0.09 A g <sup>-1</sup> )  | 6    |
| NaTi <sub>2</sub> (PO <sub>4</sub> ) <sub>3</sub> // Na <sub>2</sub> MnFe(CN) <sub>6</sub>                 | NaClO <sub>4</sub>                                                                | 61 (0.118 A g <sup>-1</sup> ) based on the total mass of cathode and anode   | 74.3% / After 13000 cycles (1.18 A g <sup>-1</sup> ) | 7    |
| LTP@C/CNTs // Na <sub>0.44</sub> MnO <sub>2</sub>                                                          | 5 M NaNO <sub>3</sub>                                                             | 83.36 (0.2 A g <sup>-1</sup> ) based on the anode mass                       | 79.4% / After 500 cycles (3 A g <sup>-1</sup> )      | 8    |
| NaTi <sub>2</sub> (PO <sub>4</sub> ) <sub>3</sub> @C // NaVPO <sub>4</sub> F@C                             | 17 M NaClO <sub>4</sub>                                                           | 43.9 (0.1 A g <sup>-1</sup> ) based on the total mass of cathode and anode   | 48.8% / After 100 cycles (0.5 A g <sup>-1</sup> )    | 9    |



|                                                                                                                                     |                                                             |                                                                                 |                                                        |              |
|-------------------------------------------------------------------------------------------------------------------------------------|-------------------------------------------------------------|---------------------------------------------------------------------------------|--------------------------------------------------------|--------------|
| Na <sub>3</sub> V <sub>2</sub> (PO <sub>4</sub> ) <sub>3</sub> //<br>Na <sub>3</sub> V <sub>2</sub> (PO <sub>4</sub> ) <sub>3</sub> | NaClO <sub>4</sub> -H <sub>2</sub> O-urea<br>ratio of 1-3-2 | 37 (0.01 A g <sup>-1</sup> ) base on<br>the total mass of cathode<br>and anode  | 72%/After 1000 cycles<br>(0.5 A g <sup>-1</sup> )      | 10           |
| NaTi <sub>2</sub> (PO <sub>4</sub> ) <sub>3</sub> //<br>Na <sub>3</sub> V <sub>2</sub> (PO <sub>4</sub> ) <sub>3</sub>              | NaTFSI: H <sub>2</sub> O:acetonitrile<br>ratio of 1:1:2.5   | 96 (0.01 A g <sup>-1</sup> ) base on<br>the anode mass                          | 71% / After 1000<br>cycles (0.5 A g <sup>-1</sup> )    | 11           |
| NaTi <sub>2</sub> (PO <sub>4</sub> ) <sub>3</sub> //<br>Na <sub>0.44</sub> MnO <sub>2</sub>                                         | NaClO <sub>4</sub> -H <sub>2</sub> O-urea<br>ratio of 1-3-2 | 74.5 (0.02 A g <sup>-1</sup> ) base on<br>the cathode mass                      | 90% / After 3500<br>cycles (0.5 A g <sup>-1</sup> )    | 12           |
| NaTi <sub>2</sub> (PO <sub>4</sub> ) <sub>3</sub> @C//<br>m-NiHCF                                                                   | 5M<br>NaClO <sub>4</sub>                                    | 61.4 (0.1 A g <sup>-1</sup> ) base on<br>the cathode mass                       | 83% / After 600<br>cycles (0.1 A g <sup>-1</sup> )     | 13           |
| Na <sub>3</sub> (PO <sub>4</sub> ) <sub>3</sub> //<br>Na <sub>3</sub> V <sub>2</sub> (PO <sub>4</sub> ) <sub>3</sub>                | 19 M<br>NaClO <sub>4</sub> -NaOTF<br>-H <sub>2</sub> O      | 40 (0.117 A g <sup>-1</sup> ) base on<br>the total mass of cathode<br>and anode | 87.5% / After 100<br>cycles (0.117 A g <sup>-1</sup> ) | 14           |
| NaTi <sub>2</sub> (PO <sub>4</sub> ) <sub>3</sub> //<br>KMnHCF                                                                      | polyethylene glycol:<br>H <sub>2</sub> O ratio of 92:8      | 105 (0.1 A g <sup>-1</sup> ) base on<br>the cathode mass                        | 80% / After 3500<br>cycles (0.8 A g <sup>-1</sup> )    | 15           |
| NaTi <sub>2</sub> (PO <sub>4</sub> ) <sub>3</sub> @C//<br>HEPBA                                                                     | 1 M<br>Na <sub>2</sub> SO <sub>4</sub>                      | 75 (0.05 A g <sup>-1</sup> ) base on<br>the cathode mass                        | 87% / After 1000<br>cycles (0.1 A g <sup>-1</sup> )    | 16           |
| NaTi <sub>2</sub> (PO <sub>4</sub> ) <sub>3</sub> //<br>Na <sub>2</sub> Zn <sub>3</sub> [Fe(CN) <sub>6</sub> ] <sub>2</sub>         | 17 M<br>NaClO <sub>4</sub>                                  | 55 (0.12 A g <sup>-1</sup> ) base on<br>the cathode mass                        | 100% / After 1000<br>cycles (0.6 A g <sup>-1</sup> )   | 17           |
| FeHCF //<br>CuHCF                                                                                                                   | Saturated<br>NaNO <sub>3</sub>                              | 50 (0.06 A g <sup>-1</sup> ) base on<br>the cathode mass                        | 86% / After 250<br>cycles (0.3 A g <sup>-1</sup> )     | 18           |
| NaTi <sub>2</sub> (PO <sub>4</sub> ) <sub>3</sub> -C //<br>AC                                                                       | 1 M<br>Na <sub>2</sub> SO <sub>4</sub>                      | 100 (0.1 A g <sup>-1</sup> ) base on<br>the anode mass                          | 61%/After 500<br>cycles (0.2 A g <sup>-1</sup> )       | 19           |
| Na <sub>2</sub> VTi(PO <sub>4</sub> ) <sub>3</sub> /C/<br>/<br>Na <sub>2</sub> VTi(PO <sub>4</sub> ) <sub>3</sub> /C                | 1 M<br>Na <sub>2</sub> SO <sub>4</sub>                      | 55 (0.05 A g <sup>-1</sup> ) base on<br>the cathode mass                        | 83% / After 600<br>cycles (0.4 A g <sup>-1</sup> )     | 20           |
| PHATN //<br>Ni(OH) <sub>2</sub>                                                                                                     | 6 M<br>NaOH                                                 | 302.5 (0.5 A g <sup>-1</sup> ) base on<br>the anode mass                        | 95.1% / After 80000<br>cycles (10 A g <sup>-1</sup> )  | This<br>work |

## Notes and references

- 1 J. He, R. Wang, L. Li, L. Zhao, M. Shi and C. Yan, *Chem Commun*, 2022, **58**, 11925–11928.
- 2 R. Wang, M. Shi, L. Li, Y. Zhao, L. Zhao and C. Yan, *Chemical Engineering Journal*, 2023, **451**, 138652.
- 3 J. Chen, C. Liu, Z. Yu, J. Qu, C. Wang, L. Lai, L. Wei and Y. Chen, *Chem Eng J*, 2021, **415**, 129003.
- 4 Q. Y. Meng, J. C. Shao, X. R. Dou and H. Z. Chi, *Small*, **20**, 2308483.
- 5 H. Gao and J. B. Goodenough, *Angewandte Chemie International Edition*, 2016, **55**, 12768–12772.
- 6 W. Zhou, Y. Zheng, M. Zartashia, Y. Shan, H. Noor, H. Lou and X. Hou, *Acs Appl Mater Inter*, 2022, **14**, 34835–34843.
- 7 H. Wu, J. Hao, Y. Jiang, Y. Jiao, J. Liu, X. Xu, K. Davey, C. Wang and S.-Z. Qiao, *Nat Commun*, 2024, **15**, 575.
- 8 T. Xu, M. Zhao, Z. Su, W. Duan, Y. Shi, Z. Li, V. G. Pol and X. Song, *Journal of Power Sources*, 2021, **481**, 229110.
- 9 Y. Wang, D. Bin, C. Wang, Y. Cao and Y. Xia, *Batteries & Supercaps*, 2023, **6**, e202300275.
- 10 Z. Hou, M. Dong, Y. Xiong, X. Zhang, Y. Zhu and Y. Qian, *Advanced Energy Materials*, 2020, **10**, 1903665.
- 11 H. Wang, T. Liu, X. Du, J. Wang, Y. Yang, H. Qiu, G. Lu, H. Li, Z. Chen, J. Zhao and G. Cui, *Batteries Supercaps*, 2022, **5**, e202200246.
- 12 Z. Hou, X. Zhang, J. Chen, Y. Qian, L.-F. Chen and P. S. Lee, *Advanced Energy Materials*, 2022, **12**, 2104053.
- 13 L. Shen, Y. Jiang, Y. Liu, J. Ma, T. Sun and N. Zhu, *Chemical Engineering Journal*, 2020, **388**, 124228.
- 14 T. Jin, X. Ji, P.-F. Wang, K. Zhu, J. Zhang, L. Cao, L. Chen, C. Cui, T. Deng, S. Liu, N. Piao, Y. Liu, C. Shen, K. Xie, L. Jiao and C. Wang, *Angewandte Chemie*

- International Edition*, 2021, **60**, 11943–11948.
- 15J. Liu, C. Yang, B. Wen, B. Li and Y. Liu, *Small*, 2023, **19**, 2370387.
- 16X. Zhao, Z. Xing and C. Huang, *J. Mater. Chem. A*, 2023, **11**, 22835–22844.
- 17M. Shao, B. Wang, M. Liu, C. Wu, F.-S. Ke, X. Ai, H. Yang and J. Qian, *Acs Appl Energ Mater*, 2019, **2**, 5809–5815.
- 18B. Wang, X. Wang, C. Liang, M. Yan and Y. Jiang, *ChemElectroChem*, 2019, **6**, 4848–4853.
- 19X. Cao and Y. Yang, *Mater Lett*, 2018, **231**, 183–186.
- 20J. Dong, G. Zhang, X. Wang, S. Zhang and C. Deng, *J. Mater. Chem. A*, 2017, **5**, 18725–18736.
